# Supplementary material for: Structural basis of the human Scribble–Vangl2 association in health and disease
Source: Oxford University Press journal article supplement (doi:10.1042/bcj20200816), 2021-03-08
Supplement: bcj-2020-0816_supp.pdf [file bcj-2020-0816_supp.pdf]

## Expanded view figure legends

**FIGURE EV2: 2Fo-Fc electron density maps of PDZ1, PDZ2 and PDZ3 complexes with Vangl2 as well as PDZ2 on its own.** **A)** Electron density map encompassing the binding groove of Scribble PDZ1 (magenta sticks) in complex with Vangl2 peptide (yellow sticks). The electron density map is shown as a blue mesh contoured at  $1.5 \sigma$ . **B)** Electron density map encompassing the binding groove of Scribble PDZ2 (green sticks) in complex with Vangl2 (yellow sticks). The electron density map is shown as a blue mesh contoured at  $1.5 \sigma$ . **C)** Electron density map encompassing the binding groove of Scribble PDZ3 (orange sticks) in complex with Vangl2 peptide (yellow sticks). The electron density map is shown as a blue mesh contoured at  $1.5 \sigma$ .

**FIGURE EV3: Circular dichroism spectroscopy of wild type and mutant Scribble PDZ1, PDZ2, PDZ3 and PDZ4 domains.**

Circular dichroism spectra recorded for wild type and mutant Scribble PDZ1,2,3 and 4 domains indicated that there were no major spectral differences between the proteins, suggesting that they were similarly folded, with mutations not leading to unfolding of the PDZ domains.

**A**

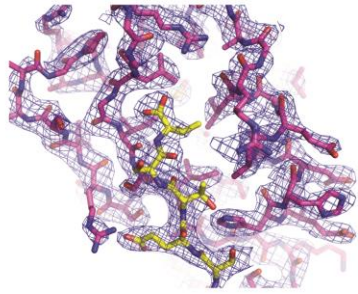

**SCRIB PDZ1:Vangl2**

**B**

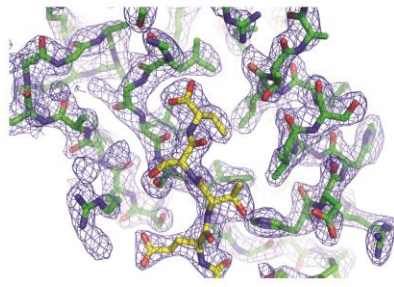

**SCRIB PDZ2:Vangl2**

**C**

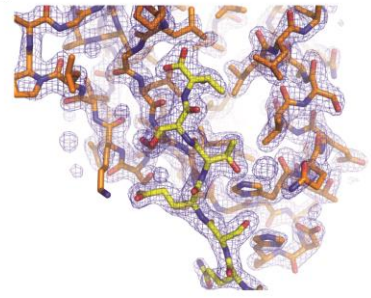

**SCRIB PDZ3:Vangl2**

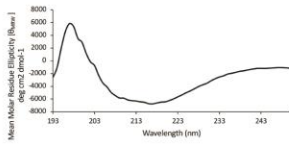

**PDZ1 WT**

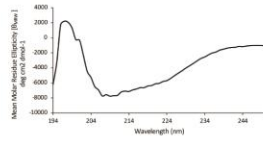

**PDZ2 WT**

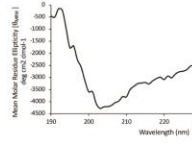

**PDZ3 WT**

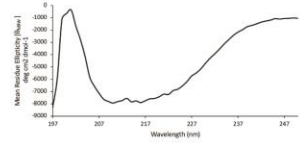

**PDZ4 WT**

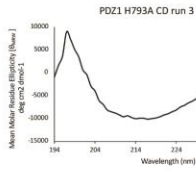

**PDZ1 H793A**

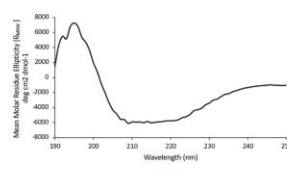

**PDZ2 R896A**

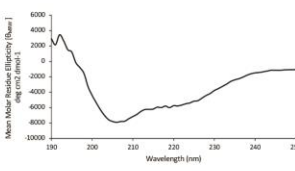

**PDZ3 P1043L**

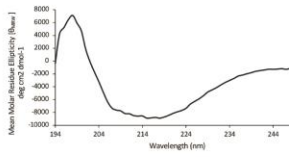

**PDZ1 Q808H**

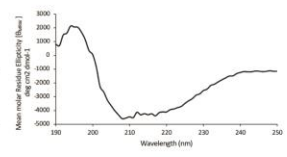

**PDZ2 H928A**

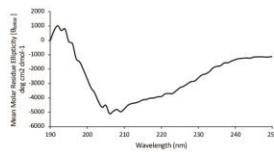

**PDZ3 R1044Q**

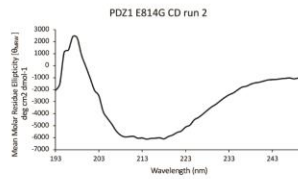

**PDZ1 E814G**

**Table EV1: X-ray crystallographic data collection and refinement statistics.**

|                                                        | PDZ1:Vangl2            | PDZ2 apo               | PDZ2:Vangl2                                    | PDZ3:Vangl2                       |
|--------------------------------------------------------|------------------------|------------------------|------------------------------------------------|-----------------------------------|
| <b>Data collection</b>                                 |                        |                        |                                                |                                   |
| Space group                                            | C 1 2 1                | P 1                    | I 2 <sub>1</sub> 2 <sub>1</sub> 2 <sub>1</sub> | P 4 <sub>1</sub> 2 <sub>1</sub> 2 |
| No of molecules in AU                                  | 4+4                    | 4                      | 4+4                                            | 2+2                               |
| Cell dimensions                                        |                        |                        |                                                |                                   |
| <i>a</i> , <i>b</i> , <i>c</i> (Å)                     | 219.37, 53.09, 53.52   | 37.89, 41.69, 49.02    | 78.05, 60.77, 96.02                            | 54.71, 54.71, 129.98              |
| $\alpha$ , $\beta$ , $\gamma$ (°)                      | 90.00, 104.12, 90.00   | 90.27, 91.96, 105.84   | 90.00, 106.48, 90.00                           | 90.00, 90.00, 90.00               |
| Wavelength (Å)                                         | 0.9537                 | 0.9537                 | 0.9537                                         | 0.9537                            |
| Resolution (Å)*                                        | 51.51-2.20 (2.28-2.20) | 31.60-2.44 (2.53-2.44) | 47.17-2.50 (2.59-2.50)                         | 37.08-1.95 (2.02-1.95)            |
| <i>R</i> <sub>sym</sub> Or <i>R</i> <sub>merge</sub> * | 0.066 (0.620)          | 0.121 0.650)           | 0.076 (0.425)                                  | 0.060 (0.763)                     |
| <i>I</i> / $\sigma$ <i>I</i> *                         | 8.3 (1.6)              | 10.5 (2.1)             | 16.2 (4.5)                                     | 38.4 (5.5)                        |
| CC(1/2)                                                | 0.999 (0.743)          | 0.994 (0.792)          | 0.999 (0.856)                                  | 1.000 (0.952)                     |
| Completeness (%)*                                      | 99.9 (100.0)           | 98.3 98.0)             | 91.5 (93.2)                                    | 99.9 (99.93)                      |
| Redundancy*                                            | 5.0 (5.1)              | 3.9 (3.9)              | 5.7 (5.7)                                      | 27.6 (28.6)                       |
| Wilson B-factor                                        | 49.57                  | 28.24                  | 30.84                                          | 34.1                              |
| <b>Refinement</b>                                      |                        |                        |                                                |                                   |
| Resolution (Å)                                         | 51.51-2.20             | 31.60-2.44             | 47.17-2.50                                     | 37.08-1.95                        |
| No. reflections                                        | 30485                  | 10507                  | 13813                                          | 15101                             |
| <i>R</i> <sub>work</sub> / <i>R</i> <sub>free</sub>    | 0.260/0.288            | 0.225/0.269            | 0.236/0.270                                    | 0.223/0.262                       |
| No. non-hydrogen atoms                                 |                        |                        |                                                |                                   |
| Protein                                                | 3238                   | 2699                   | 2777                                           | 1328                              |
| Ligand/ion                                             | 111                    | 8                      | 32                                             | -                                 |
| Water                                                  | 46                     | 81                     | 98                                             | 81                                |
| <i>B</i> -factors                                      |                        |                        |                                                |                                   |
| Protein                                                | 68.66                  | 32.90                  | 35.60                                          | 46.36                             |
| Ligand/ion                                             | 71.34                  | 37.21                  | 42.39                                          | -                                 |
| Water                                                  | 59.55                  | 31.71                  | 31.62                                          | 45.70                             |
| R.m.s. deviations                                      |                        |                        |                                                |                                   |
| Bond lengths (Å)                                       | 0.006                  | 0.004                  | 0.003                                          | 0.004                             |
| Bond angle (°)                                         | 1.09                   | 1.01                   | 0.68                                           | 1.03                              |
| Ramachandran plot (%)                                  |                        |                        |                                                |                                   |
| Favored                                                | 97.8                   | 97.4                   | 98.1                                           | 99.4                              |
| Allowed                                                | 2.2                    | 2.6                    | 1.9                                            | 0.6                               |
| Disallowed                                             | 0                      | 0                      | 0                                              | 0                                 |
